# Supplementary material for: A high-throughput protocol for mutation scanning of the BRCA1 and BRCA2 genes
Source: BMC Cancer. 2011 Jun 24;11:265. doi: 10.1186/1471-2407-11-265 (PMC3146935; doi:10.1186/1471-2407-11-265)
Supplement: Additional file 3 — Table S1: Reaction layout. This table shows the layout used for each of the 12 plates in a 22 sample run. Each plate can run 8 assays with 22 test samples, a wildtype control and a no template control. [file 1471-2407-11-265-S3.XLS]

## Sheet: 22 SAMPLE LAYOUT
	1/2	3/4	5/6	7/8	9/10	11/12	13/14	15/16	17/18	19/20	21/22	23/24
A	MM1-S1	MM1-S9	MM1-S17	MM2-S1	MM2-S9	MM2-S17	MM3-S1	MM3-S9	MM3-S17	MM4-S1	MM4-S9	MM4-S17
B	MM1-S2	MM1-S10	MM1-S18	MM2-S2	MM2-S10	MM2-S18	MM3-S2	MM3-S10	MM3-S18	MM4-S2	MM4-S10	MM4-S18
C	MM1-S3	MM1-S11	MM1-S19	MM2-S3	MM2-S11	MM2-S19	MM3-S3	MM3-S11	MM3-S19	MM4-S3	MM4-S11	MM4-S19
D	MM1-S4	MM1-S12	MM1-S20	MM2-S4	MM2-S12	MM2-S20	MM3-S4	MM3-S12	MM3-S20	MM4-S4	MM4-S12	MM4-S20
E	MM1-S5	MM1-S13	MM1-S21	MM2-S5	MM2-S13	MM2-S21	MM3-S5	MM3-S13	MM3-S21	MM4-S5	MM4-S13	MM4-S21
F	MM1-S6	MM1-S14	MM1-S22	MM2-S6	MM2-S14	MM2-S22	MM3-S6	MM3-S14	MM3-S22	MM4-S6	MM4-S14	MM4-S22
G	MM1-S7	MM1-S15	MM1-S23	MM2-S7	MM2-S15	MM2-S23	MM3-S7	MM3-S15	MM3-S23	MM4-S7	MM4-S15	MM4-S23
H	MM1-S8	MM1-S16	MM1-S24	MM2-S8	MM2-S16	MM2-S24	MM3-S8	MM3-S16	MM3-S24	MM4-S8	MM4-S16	MM4-S24
I	MM5-S1	MM5-S9	MM5-S17	MM6-S1	MM6-S9	MM6-S17	MM7-S1	MM7-S9	MM7-S17	MM8-S1	MM8-S9	MM8-S17
J	MM5-S2	MM5-S10	MM5-S18	MM6-S2	MM6-S10	MM6-S18	MM7-S2	MM7-S10	MM7-S18	MM8-S2	MM8-S10	MM8-S18
K	MM5-S3	MM5-S11	MM5-S19	MM6-S3	MM6-S11	MM6-S19	MM7-S3	MM7-S11	MM7-S19	MM8-S3	MM8-S11	MM8-S19
L	MM5-S4	MM5-S12	MM5-S20	MM6-S4	MM6-S12	MM6-S20	MM7-S4	MM7-S12	MM7-S20	MM8-S4	MM8-S12	MM8-S20
M	MM5-S5	MM5-S13	MM5-S21	MM6-S5	MM6-S13	MM6-S21	MM7-S5	MM7-S13	MM7-S21	MM8-S5	MM8-S13	MM8-S21
N	MM5-S6	MM5-S14	MM5-S22	MM6-S6	MM6-S14	MM6-S22	MM7-S6	MM7-S14	MM7-S22	MM8-S6	MM8-S14	MM8-S22
O	MM5-S7	MM5-S15	MM5-S23	MM6-S7	MM6-S15	MM6-S23	MM7-S7	MM7-S15	MM7-S23	MM8-S7	MM8-S15	MM8-S23
P	MM5-S8	MM5-S16	MM5-S24	MM6-S8	MM6-S16	MM6-S24	MM7-S8	MM7-S16	MM7-S24	MM8-S8	MM8-S16	MM8-S24
				µL per reaction
	1x LightScanner Master Mix			4
	5uM F inhouse primer			0.5
	5uM R inhouse primer			0.5
	PCR GRADE H2O			2
	Aliquot mastermix by epMotion			7
	Aliquot 3.3ng/µL DNA (epMotion req 70µL for a full plate)			3
	Total reaction volume			10
