# Supplementary material for: A high-throughput protocol for mutation scanning of the BRCA1 and BRCA2 genes
Source: BMC Cancer. 2011 Jun 24;11:265. doi: 10.1186/1471-2407-11-265 (PMC3146935; doi:10.1186/1471-2407-11-265)
Supplement: Additional file 4 — Table S2: PCR primer sequences. This table shows the final set of primers used. M13 sequences, where used, are indicated in bold. [file 1471-2407-11-265-S4.XLS]

## Sheet: BRCA1
BRCA1 PRIMER INFORMATION
AMPLICON	BIC	HGVS	FORWARD PRIMER (SEQUENCE 5'>3')	TM (OLIGOCALC)	REVERSE PRIMER (SEQUENCE 5'>3')	TM (OLIGOCALC)	AMPLICON LENGTH	ANALYSABLE LENGTH	GC%
2	101-199	UTR-c80	TGT AAA ACG ACG GCC AGT CTT TTA AAA AGA TAT ATA TAT ATG TTT TTC TAA TGT GT	65	CAG GAA ACA GCT ATG ACC TCC CAA ATT AAT ACA CTC T4G TGC TGA (4=INOSINE)	65	174	109	32.1
3	200-253	c.81-c.134	ATT GAG CCT CAT TTA TTT TCT TTT TCT CC	65	TAA TGG AGC CAC ATA ACA CAT TCA AAC	65	130	74	41.5
5	254-331	c.135-c.212	CCT TTT GAG TAT TCT TTC TAC AAA AGG AAG	66	TTT CCT ACT GTG GTT GCT TCC AAC	65	194	140	32
6	332-420	c.213-c.301	ATA ATC ACT TGC TGA GTG TGT TTC TC	64	GAG TGT CAT TCT TGG GAT ATT CAA C	64	161	112	36
7A	421-489	c.302-c.370	CTA ACT GCA AAC ATA ATG TTT TCC CTT G	66	GTT TCT GTA GCC CAT ACT TTG GAT GA	65	134	80	32.1
7B	485-560	c.366-c.441	CTC TCC TGA ACA TCT AAA AGA TGA AGT	65	AAG AAG AAG AAG AAG AAG AAA ACA AAT GG	65	138	82	38.4
8	561-665	c.442-c.546	AAT TGC TTG ACT GTT CTT TAC CAT ACT G	66	GCA ATT ATT ATT AAA TAC TTA AAA AAC CTG AGA C	66	179	117	39.7
9	666-712	c.547-c.593	ACT TTT ATT GAT TTA TTT TTT GGG GGG AAA T	64	CTT CAT AGA CAA AGG TTC TCT TTG AC	64	115	58	33.3
10	713-788	c.594-c.669	TAC ATG TAA CTA GTG TTT CTT ATT AGG AC	65	ACT GTA TCT ACC CAC TCT CTT TTC AG	66	181	126	39.8
11A	789-1013	c.670-c.894	TAA TGA CAA TTC AGT TTT TGA GTA CCT TG	65	GCT TTT ATT ACA GAA TTC AGC CTT TTC TAC	66	304	244	37.8
11B	1005-1268	c.886-c.1149	GAA CAG CAG TTT ATT ACT CAC TAA AGA C	66	GTT CAT CAC TTC TGG AAA ACC ACT C	65	317	264	40.4
11C	1253-1524	c.1134-c.1415	TGT TCC TTG GAT AAC ACT AAA TAG CAG	65	ATG GCT TAA GTT GGG GAG GCT TG	66	322	272	38.5
11D	1516-1863	c.1397-c.1744	TTG AAG ACA AAA TAT TTG GGA AAA CCT ATC	65	TGC TGC TTA TAG GTT CAG CTT TCG T	65	402	347	37.3
11E	1840-2107	c.1721-c.1988	GAG AAA AAT CCT AAC CCA ATA GAA TCA C	66	ACC TTC CAT GAG TTG TAG GTT TCT G	65	321	268	37.7
11F	2098-2376	c.1979-c.2257	AAA AAA GTA CAA CCA AAT GCC AGT CAG	66	TTC AGT TTG CAA AAC CCT TTC TCC AC	65	328	279	38.7
11G	2358-2637	c.2239-c.2518	CAG TTA AAG TGT CTA ATA ATG CTG AAG AC	66	CCA TTT CTA TGC TTG TTT CCC GAC	65	333	280	39.9
11H	2636-2907	c.2517-c.2788	TAT CCA TTG GGA CAT GAA GTT AAC CA	64	GCT TAT CTT TCT GAC CAA CCA CAG	65	322	272	40.1
11I	2874-3011	c.2755-c.2892	AAT CAA GGA AAG AAT GAG TCT AAT ATC AAG	65	TAA AAG TCC ATG TTT ATT TGG AGT AAT GAG	65	198	138	38.9
11J	3003-3310	c.2884-c.3191	TGT AAA ACG ACG GCC AGT TCT ATC ATC TCA GTT CAG AGG CAA C	65	CAG GAA ACA GCT ATG ACC CTA GTT CTG CTT GAA TGT TTT CAT CAC	65	359	307	35.7
11K	3306-3567	c.3078-c.3448	TGG GCT CCA GTA TTA ATG AAA TAG GT	64	CAC CAT CAT CTA ACA GGT CAT CAG	65	312	262	38.1
11L	3560-3836	c.3441-c.3717	GTA GTC ATG CAT CTC AGG TTT GTT C	65	CGG TGC TAT GCC TAG TAG ACT G	65	324	277	42.6
11M	3803-3975	c.3684-c.3856	AGA GCT TCC CTG CTT CCA ACA C	65	GCT AGC AGA ACA TTT TGT TTC CTC AC	66	220	172	40
11N	3972-4215	c.3853-c.4096	CAA AGG CAT CTC AGG AAC ATC AC	64	GGC AAA CAC AAA AAC CTG GTT CC	64	295	244	41.7
12	4216-4302	c.4097-c.4183	TTA TAG TCT GCT TTT ACA TCT GAA CCT CTG T	68	GAT ACA TAC TAC TGA ATG CAA AGG AC	64	200	143	43.5
13	4303-4476	c.4184-c.4357	CAT TTT CTT GGT GCC ATT TAT CGT	62	GAT ATC AGT GTT TGG CCA ACA ATA CAC	67	233	182	44.6
14	4477-4603	c.4358-c.4484	AGC AGT AAA GTA GAT TTG TTT TCT CAT TCC	66	CAA TAT AAA TAA AGA TGT CAG ATA CCA CAG CA	67	221	159	35.7
15	4604-4794	c.4485-c.4675	GGC GAT GGT TTT CTC CTT CCA	62	CAA AGT GTT TGT TCC AAT ACA GCA GA	64	260	215	43.8
16	4795-5105	c.4676-c.4986	GTT GTG TAA ATT AAA CTT CTC CCA TTC C	66	TCA TTA GGG AGA TAC ATA TGG ATA CAC	65	374	321	46
17	5106-5193	c.4987-c.5074	TGT GTG CTA GAG GTA ACT CAT GAT AAT GG	69	AGC AGA TGC AAG GTA TTC TGT AAA GGT TCT TGG	73	175	113	34.9
18	5194-5271	c.5075-c.5152	GAT TTT GTT TTC AAC TTC TAA TCC TTT GAG TG	67	GTG TTA AAG GGA GGA GGG GAG A	65	164	110	37.2
19	5272-5312	c.5153-c.5193	GTT CTT CTG CTG TAT GTA ACC TGT CT	66	CTA TAT GAC TGA ATG AAT ATC TCT GGT TAG	66	136	81	35.3
20	5313-5396	c.5194-c.5277	TGT AAA ACG ACG GCC AGT CTT TCT CTT ATC CTG ATG GGT TGT G	65	CAG GAA ACA GCT ATG ACC GAG TGG TGG GGT GAG ATT TTT GTC	67	178	129	45.9
21	5397-5526	c.5278-c.5332	TGT AAA ACG ACG GCC AGT TCC TTC TCT CCA TTC CCC TGT C	65	CAG GAA ACA GCT ATG ACC CTC CAC TAT GTA AGA CAA AGG CTG	65	153	107	53.3
22	5527-5586	c.5333-c.5407	ATT ACT GCA GTG ATT TTA CAT CTA AAT GTC	65	ACA GGT GCC AGT CTT GCT CAC	65	182	131	45.6
23	5527-5586	c.5408-c.5467	CAC TTT GAA TGC TCT TTC CTT CCT G	65	CCC CAT ATA GCA CAG GTA CAT GC	66	129	81	53.5
24	5587-5711	c.5468-c.5592	ATT GAT TAG AGC CTA GTC CAG GAG	65	GCC TGG AAA GGC CAC TTT GTA AG	66	259	216	53.7

## Sheet: BRCA2
BRCA2 PRIMER INFORMATION
AMPLICON	BIC	HGVS	FORWARD PRIMER (5'>3')	TM (OLIGOCALC)	REVERSE PRIMER (5'>3')	TM (OLIGOCALC)	AMPLICON LENGTH	ANALYSABLE LENGTH	GC%
2	190-295	UTR-c.67	CTT ATT TAC CAA 4CA TTG GAG GAA TAT C (4=INOSINE)	66	GTA CTG GGT TTT TAG CAA GCA TTT TTT AG	66	184	127	32.6
3A	296-456	c.68-c.228	GGT CAC AAA TTT GTC TGT CAC TGG T	65	CTT GCT CTT TGA ATA TTA TTG GAG T	61	243	193	33.7
3B	425-544	c.197-c.316	TGT AAA ACG ACG GCC AGT ACG AAC CAA ACC TAT TTA AAA CTC CAC	65	GGT CAT AGC TGT TTC CTG TTT GCC TAA ATT CCT AGT TTG TAG TTC TC	66	203	147	37.3
4	545-653	c.317-c.425	TAC ATT CTC ACT GAA TTA TTG TAC TG	61	TCA TTT AAA TAT TTT AAT ATA ATA GCT TCA TC	61	177	119	31.6
5	654-703	c.426-c.475	CAG TTT TTT AAA ATA ACC TAA GGG ATT TGC T	66	TCT AGT ATT CTA AGA ATA AAA AGC ATT G	61	136	77	28.7
6	704-744	c.476-c.516	CTT AAC AAT TTT CCC CTT TTT TTA CC	61	TAT TGT CAA ATT CTC AAT TAC TAA GTC	61	127	74	32.3
7	745-859	c.517-c.631	GAG TGA ATG AAA AAA TAA TAT CCT TAA TGA TC	65	ATG ACA ATT ATC AAC CTC ATC TGC TC	64	246	188	36.6
8	860-909	c.632-c.681	GTT TTT GCA TTC TAG TGA TAA TAT ACA ATA CAC	66	TTA GCA ATT TCA ACA GTC TAA TCA ATG TC	65	143	81	28.7
9	910-1021	c.682-c.793	ATA AGG GGG GAC TAC TAC TAT ATG TG	66	CAA AAA AAC CTG TAG TTC AAC TAA ACA GAG	66	220	165	32.7
10A	1022-1230	c.794-c.1002	TGT AAA ACG ACG GCC AGT TTA TAT GGC TTA TAA AAT ATT AAT GTG CTT CTG	66	CAG GAA ACA GCT ATG ACC TTT TTC ACA TTC ATC AGC GTT TGC TTC	65	285	225	31.1
10B	1218-1409	c.990-c.1181	AAA AAG TAA GAA CTA GCA AGA CTA GGA A	64	ACC TGA AAG GGT TAG TTG AGA CCA T	65	245	192	36.3
10C	1409-1593	c.1181-c.1365	GTT GTA CCG TCT TTG GCC TGT G	65	CTG TTT CCT CAT TTA ATG GCT TCT C	64	232	185	37.9
10D	1571-1799	c.1343-c.1571	TTC TTA CTT CAG AGA ATT CTT TGC CAC	65	TCA GTT TCT TTT TTA AAG TTT GGA TCA GTC	65	286	229	36.4
10E	1746-1988	c.1518-1760	CAG AAT AAG AGA ATC ACC TAA AGA GAC	65	GTT TTC TTT TTC AAA GTG GAT ATT AAA CCT G	66	243	185	37.4
10F	1958-2137	c.1730-c.1909	ACA CAG AAT TCT GTA GCT TTG AAG AAT G	66	AGA AAA AAA CAC AGA AGG AAT CGT CAT C	66	282	226	30.1
11A	2138-2377	c.1910-c.2149	TGA TGG TAC TTT AAT TTT GTC ACT TTG TGT	65	GAA ACT TTT TTG CTT TTT GGA TCA TTT TCA C	66	313	252	33.2
11B	2372-2614	c.2144-c.2386	CTC TGT CAT GCC TGC AGG AAG	65	AGA TTC ATA ATT GTT ACC TTT GAG CTT GT	65	293	243	37.2
11C	2613-2902	c.2385-c.2674	AAG ATT ATT CCT TTC ATT AGC TAC TTG GA	65	CTA GAG GCA AAG AAT CAT ACA AAA TGT C	66	355	290	31.4
11C2	2810-3068	c.2582-c.2840	CAA CCA AAA CAC AAA TCT AAG AGT AAT CC	66	GTT CTC CTC TGC AAG AAC ATA AAC C	65	313	259	33.2
11D	3054-3235	c.2826-c.3007	GTGA ATA AAC AAG CAA CCC AAG TGT C	66	TTC TGA AGC TAC CTC CAA AAC TGT G	65	231	181	32.9
11E	3224-3543	c.2996-c.3315	AAC AAA TGG GCA GGA CTC TTA GGT	65	AAG TTC TGT AAT TTC TGC CTT TTG GCT	65	372	320	33.6
11F	3541-3855	c.3313-c.3627	GCA GGA TTT TAA TTC AAA CCA TAA TTT AAC AC	66	CCC TAA ACC CCA CTT CAT TTT CAT C	65	371	316	37.2
11G1	3843-4003	c.3615-c.3775	TTG AAA AAT GAC TGT AAC AAA AGT GCT TC	65	CAG AAT CAT GAC ATT TAC TTG AAG ATA AAC	65	220	161	35
11G2	399-4146	c.3771-c.3918	GAA ACT TCT GCA GAG GTA CAT CCA	65	AGT ATT TCT CTT GTA ATT TTC AGT AAT TTC TTC	65	203	147	26.6
11H	4140-4423	c.3912-c.4195	ACA AAA TAA TAT TGA AAT GAC TAC TGG CAC	65	ACT GTT CTT TAT TTG AAG TAT TAC CAT GAC	65	344	284	31.1
11I short	4423-4522	c.4195-c.4294	GAA GTT GCG AAA GCT CAA GAA GCA	65	TTT GGC GAC ACT AAT ATT TTT CCC ACT	65	150	99	34
11I	4423-4736	c.4195-c.4508	GAA GTT GCG AAA GCT CAA GAA GCA	65	GGT TGT CCC TGG AAG GTC ACT	65	359	314	33.1
11J1	4729-4983	c.4501-c.4755	AAA GTG TCC CAG TTG GTA CTG GA	64	TTT CTT TAC ACT TTG GGG CAG CTG T	65	303	255	40.9
11J2	4983-5205	c.4755-c.4977	TTG AAT TAG CAT GTG AGA CCA TTG AG	64	GGC TGA ATT TTC AAT GAC TGA ATA AGG	65	278	225	33.8
11J3	5204-5426	c.4976-c.5198	AAA GTC CTG CAA CTT GTT ACA CAA ATC AGT C	70	TAC TGT TAC TTA AAT AAG TAT CTT GTT TTT CG	65	285	226	31.2
11K1	5413-5579	c.5185-c.5351	AAT TCA AAC AGT ACT ATA GCT GAA AAT GAC	65	ACA TTG GAT ATT ACT TTG GAA AAA CTA GTG	65	227	161	30.4
11K2	5569-5770	c.5341-c.5542	TTG AGC CAG TAT TGA AGA ATG TTG AAG	65	CAT GTG AAA CAC AAA CGA TTT TAC CAC	65	255	201	34.9
11L	5769-6021	c.5541-c.5793	GGC CAC CTG CAT TTA GGA TAG C	65	CTC CAA TCC AGA CAT ATT TTG GTT ATG	65	301	252	33.9
11M	6007-6213	c.5779-c.5985	CAC ATA AGG TTT TTG CTG ACA TTC AGA G	67	CTT CTA TTT CAG AAA ACA CTT GTC TTG C	65	266	208	34.5
11N	6209-6453	c.5981-c.6225	GTC CAG GTA TCA GAT GCT TCA TTA C	65	ATC AAA TTC CTC TAA CAC TCC CTT AAC	65	297	245	0.5
11O	6425-6678	c.6197-c.6450	ATT TAG TAC AGC AAG TGG AAA GCA AG	64	TTG TTG AAA TTG AGA GAG ATA TGG AGA AAC	66	310	254	32.6
11P	6672-6924	c.6444-c.6696	AGG TGG TTC TTC AGA AAA TAA TCA CTC	65	TGT CAG TTC ATC ATC TTC CAT AAA AGC	65	307	253	32.9
11Q	6920-7069+17	c.6692-c.6841+17	ACT ACT TTG AAA CAG AAG CAG TAG AAA TTG	66	AAA AAT AGT GAT TGG CAA CAC GAA AGG	65	221	167	36.2
12	7070-7165	c.6842-c.6937	CTT TTG AGA AAT AAA ACT GAT ATT ATT TGC CT	65	TAT ATA CCA TAC CTA TAG AGG GAG AAC	66	211	152	43.5
13	7166-7236	c.6938-c.7008	GTG TAT TTA CAG TAA CAT GGA TAT TCT CT	65	CAT TTA TAA AAA CGA GAC TTT TCT CAT ACT G	66	206	146	28.2
14A	7236-7493	c.7008-c.7265	ATC ACC ATG TAG CAA ATG AGG GTC T	65	GTT TTA AAA GGT GGA ACA AAG ACT TTG G	66	326	273	35
14B	7431-7663	c.7203-c.7435	ACA CTT GAT TAC TAC AGG CAG ACC	65	ACT GAA AGG CAA AAA TTC ATC ACA CAA ATT GTC	66	296	239	33.8
15	7664-7829	c.7436-c.7601	TGT AAA ACG ACG GCC AGT TTC AAT TTT ATT TTT GCT AAG TAT TTA TTC TTT GA	64	CAG GAA ACA GCT ATG ACC TTA CAC TCT GTC ATA AAA GCC ATC AG	64	267	205	38.7
16	7830-8033	c.7602-c.7805	TGT TTT TCT TTT TTG TGT GTG TTT ATT TTG TG	65	CAT AAA AGT TAA CAC ACA ATC TTT TTG CAT AG	66	260	196	34.2
17	8034-8204	c.7806-c.7976	GTG GTT TTT ATG ATA ATA TTC TAC 4TT TAT TTG TTC (4=INOSINE)	66	CCA TAC TGC CGT ATA TGA TTA CGT AAT G	67	254	190	37.5
18A	7205-8432	c.6977-c.8204	TCT AGA GTC ACA CTT CCT AAA ATA TGC	65	CTT AAC AGC ATA CCA CCC ATC TG	64	258	208	34.9
18B	8376-8559	c.8148-c.8331	GAT ACC CAA AAA GTG GCC ATT ATT GAA	65	TCA ATG ACT GAT TTT TAC CAA GAG TGC	65	237	183	42.6
19	8560-8715	c.8332-c.8487	ATT TAA CTA CTA AAT CAA TAT ATT TAT TAA TTT GTC C	65	AAG AAA TAT ATG GTA AGT TTC AAG AAT ACA TC	65	237	162	35.4
20	8716-8860	c.8448-c.8632	ATA TAT GTG ACT TTT TTG GTG TGT GTA AC	65	CAT ATT AGA AAT AAC AAT GTG TAC CAT ATA AC	65	227	166	33.5
21	8861-8982	c.8633-c.8755	GTT TTA GTT GCT TTT GAA TTT ACA GTT TAG TG	66	AAG CCT CAT TAT ATG TCC TCT TAC TC	64	212	154	37.7
22	8983-9181	c.8755-c.8953	GAT TGC TTT TTA TTC CAA TAT CTT AAA TGG TC	66	CAT TTT TTA AGT TAA TAA AAC TGA TAA AAA CAA AGC	65	285	217	34
23	9182-8345	c.8954-c.9117	TTC CAT TGC ATC TTT CTC ATC TTT CTC	65	TAT GGA GAT TCC ATA AAC TAA CAA GCA C	66	264	208	32.6
24	9346-9484	c.9118-c.9256	GAT AAG TGC TTG TTA GTT TAT GGA ATC TC	66	TTA AAA GAA TCA ATA AAA AAA ATT AAC TAT ATT GTG C	65	242	176	33.1
25	9485-9729	c.9257-c.9501	TCT TGC ATC TTA AAA TTC ATC TAA CAC ATC	65	TAA AAG CTA TTT CCT TGA TAC TGG ACT G	66	339	276	35.2
26	9730-9876	c.9502-c.9648	GGT TTG CAA TTT ATA AAG CAG CTT TTC C	66	CCT CCA TAT ATA CTT CTT ATA ATA TTC CTT G	66	237	178	37.1
27A	9877-10129	c.9649-c.9901	GAT TTA GTT TTT TAT GTT ACT ACA TAA TTA TGA TAG	65	TAC AAA TGG GAC TAA CAG GTG GAG	65	275	214	36.5
27B	10055-10342	c.9827-c.10114	GCC TTG GAT TTC TTG AGT AGA CTG	65	GAT AAT CTT CTG AAC TGG TGG GAG	65	331	283	39.6
27C	10255-10543	c.10027-c.10315	TGT CAG TGA ATC CAC TAG GAC TG	64	CAA CTG AAG CAA AAG TAT ACC AAT ACG	65	363	313	37.5
