# Supplementary material for: A high-throughput protocol for mutation scanning of the BRCA1 and BRCA2 genes
Source: BMC Cancer. 2011 Jun 24;11:265. doi: 10.1186/1471-2407-11-265 (PMC3146935; doi:10.1186/1471-2407-11-265)
Supplement: Additional file 6 — Table S4: List of previously untested variants found during validation. These are the previously undetected variants that were detected during blinded testing. [file 1471-2407-11-265-S6.XLS]

## Sheet: Sheet1
BRCA1
EXON	AMPLICON	BIC NOMENCLATURE	HGVS NOMENCLATURE	PROTEIN	CLASSIFICATION
2		194C>T	c.75C>T	P25P	SYN
3		IVS2-14C>T	c.81-14C>T		IVS
9		c.594-2A>C	IVS9-2A>C		P IVS
10		IVS10+16G>A	c.788G>A		IVS
11	11A	812G>A	c.693G>A	T231T	SYN
11	11A	1005A>G	c.886A>G	R296G	UV
11	11A	1012A>G	c.893A>G	N298S	UV
11	11C	1606G>A	c.1487G>A	R496H	UV
11	11G	2555A>G	c.2436A>G	L812L	SYN
11	11H	2685T>C	c.2566T>C	Y856H	POLY
11	11H	2732_2733insT	c.2613_2614insT	STOP902	P
11	11H	2880C>T	c.2761C>T	Q921X	P
12		4239delAG	c.4120delAG	STOP1374	P
14		IVS14+14A>G	c.4484+14A>G		IVS
15		4754C>G	c.4635C>G	H1545Q	UV
16		IVS16-11T>C	c.4987-11T>C		IVS
20		5326T>C	c.5207T>C	V1736A	UV
22		IVS22+23G>A	c.5407+23G>A		IVS
22		5618G>T	5499G>T	E1794X	P
BRCA2
EXON	AMPLICON	BIC NOMENCLATURE	HGVS NOMENCLATURE	PROTEIN	CLASSIFICATION
3	3A	421C>G	c.193C>G	P65A	UV
4		551A>G	c.323A>G	N108S	UV
7		IVS7+25C>T	c.631+25C>T		IVS
10	10D	1766 A>G	c.1538A>G	K513R	UV
10	10A	1115A>G	c.887A>G	T296C	POLY
10	10A	1206C>A	c.978C>A	S326R	POLY
11	11D	3207G>A	c.2979G>A	STOP993	P
11	11F	3744G>A	c.3516G>A	S1172S	POLY
11	11J1	4791A>G	c.4563A>G	L1531L	POLY
11	11J1	4859delA	c.4631delA	STOP1544	P
11	11J2	5401A>T	5173A>T	K1649X	P
11	11J3	5156T>C	c.4928T>C	V1643A	UV
11	11K1	5477C>T	c.5249C>T	S1750F	UV
11	11K1	5540G>A	c.5312G>A	G1771D	POLY
11	11K2	5531delTT	c.5303delTT	STOP1772	P
11	11M	6092C>A	c.5864C>A	S1955X	P
11	11L/11M	6097A>G	c.5869A>G	I1957V	UV
11	11O	6575A>G	c.6347A>G	H2116R	POLY
12		7079C>T	c.6851C>T	S2284L	UV
14	14A	7324C>G	c.7096C>G	L2366V	UV
15	14B	7697T>C	c.7469T>C	I2490T	UV
20		8763delAGAG	c.8535_8538delAGAG	STOP2862	P
26		9809C>A	c.9581C>A	P3194Q	UV
27	27C	10460 C>G	c.10232C>G	T3411R	UV
